# Supplementary material for: MRI radiomic study on prediction of nonenlarged lymph node metastasis of rectal cancer: reduced field-of-view versus conventional DWI
Source: Springer Nature journal article supplement (doi:10.1186/s41747-025-00575-0), 2025-03-22
Supplement: MOESM1 [file 41747_2025_575_MOESM1_ESM.pdf]

**MRI radiomic study on prediction of nonenlarged lymph node metastasis  
of rectal cancer: reduced field-of-view versus conventional DWI**

**ELECTRONIC SUPPLEMENTARY MATERIAL**

**Table S1.** Radiomic features remained after selection

| Modality<br>/Methods | Radiomic features                                                                                                                                                                                                                                                                                                                                                                     |
|----------------------|---------------------------------------------------------------------------------------------------------------------------------------------------------------------------------------------------------------------------------------------------------------------------------------------------------------------------------------------------------------------------------------|
| T2WI                 | original_shape_Maximum2DdiameterRow<br>original_shape_Sphericity<br>gradient_glrlm_RunLengthNonUniformity<br>original_firstorder_InterquartileRange<br>wavelet-LLH_firstorder_90Percentile<br>wavelet-LLH_firstorder_InterquartileRange                                                                                                                                               |
| cADC                 | wavelet-LLH_glcmlmc2<br>wavelet-HLL_firstorder_Maximum<br>wavelet-LLL_firstorder_Skewness<br>wavelet-LLL_glrlm_RunLengthNonUniformity<br>original_shape_Sphericity<br>original_glszm_ZonePercentage<br>wavelet-LLH_firstorder_RootMeanSquared<br>wavelet-LLH_glcmlmc2<br>wavelet-LLH_glszm_LargeAreaHighGrayLevelEmphasis                                                             |
| cDWI <sub>b800</sub> | wavelet-LHL_glcmlmc2<br>wavelet-LHL_glszm_ZoneEntropy<br>wavelet-HLL_firstorder_90Percentile<br>wavelet-HLL_firstorder_Entropy<br>wavelet-HLL_glrlm_HighGrayLevelRunEmphasis<br>wavelet-HLL_ngtdm_Contrast<br>log-sigma-3-mm-3D_firstorder_Skewness<br>original_shape_MinorAxisLength<br>original_firstorder_InterquartileRange<br>original_gldm_SmallDependenceHighGrayLevelEmphasis |
| rADC                 | log-sigma-3-mm-3D_glrlm_GrayLevelNonUniformityNormalized<br>log-sigma-5-mm-3D_glrlm_GrayLevelNonUniformityNormalized<br>wavelet-HLL_glrlm_ShortRunHighGrayLevelEmphasis                                                                                                                                                                                                               |
| rDWI <sub>b800</sub> | wavelet-LLH_glszm_GrayLevelNonUniformity<br>wavelet-LHH_glszm_LargeAreaLowGrayLevelEmphasis<br>gradient_glszm_ZonePercentage                                                                                                                                                                                                                                                          |

cADC and rADC indicated radiomic ROIs were delineated on ADC maps of corresponding DWI imaging,

while cDWI<sub>b800</sub> and rDWI<sub>b800</sub> indicated radiomic ROIs were delineated on DWI images with  $b = 800 \text{ s/mm}^2$ .

Wavelet-filtered radiomic features were derived from the decomposition of images into different frequency sub-bands. The acronyms (e.g., HLL, LHL) denote the sequence of high-pass (H) and low-pass (L) filtering applied at each decomposition level. 'H' represents high-pass filtering (capturing high-frequency details), while 'L' represents low-pass filtering (capturing low-frequency smooth components). For example, 'HLL' indicates high-pass filtering in the first dimension and low-pass filtering in the second and third dimensions.

*glcm* gray level co-occurrence matrix, *gldm* gray level dependence matrix, *glrlm* gray level run length matrix, *glszm* gray level size zone matrix, *ngtdm* neighboring gray tone difference matrix.
